# Supplementary material for: The Complete Chloroplast Genome of Capsicum annuum var. glabriusculum Using Illumina Sequencing
Source: PubMed Central journal article supplement (PMC6332240; doi:10.3390/molecules200713080), 2015-07-20
Supplement: molecules-20-13080-s001.pdf [file molecules-20-13080-s001.pdf]

## Supplementary Information

**Table S1.** SSR candidates of *Capsicum annuum* var. *glabriusculum* chloroplast genome.

| Type of SSR       | SSR Abundances | Percentage Abundance (%) |
|-------------------|----------------|--------------------------|
| Dinucleotide      |                |                          |
| TA/AT             | 9              | 7.2                      |
| Trinucleotide     |                |                          |
| TTC/TCT/CTT       | 9              | 7.2                      |
| TTA/TAT/ATT       | 23             | 18.4                     |
| Tetranucleotide   |                |                          |
| TTTG/TTGT/TGTT    | 9              | 7.2                      |
| TCTT/CTTT/TTTC    | 9              | 7.2                      |
| ATAA/TAAA/AAAT    | 16             | 12.8                     |
| AATT/ATTA/TTAA    | 9              | 7.2                      |
| AAAT/AATA/ATAA    | 19             | 15.2                     |
| Pentanucleotide   |                |                          |
| TTTTA/TTTAT/TTATT | 11             | 8.8                      |
| TTATT/TATTT/ATTTT | 11             | 8.8                      |
| Total             | 125            | 100                      |

**Table S2.** SNP markers of *Capsicum annuum* var. *glabriusculum* chloroplast genome.

| No. | REF<br>( <i>C. annuum</i> ) | ALT<br>( <i>C. annuum</i> var. <i>glabriusculum</i> ) | Coding Region     | QUAL | Region |
|-----|-----------------------------|-------------------------------------------------------|-------------------|------|--------|
| 1   | T                           | C                                                     | non-coding region | 222  | LSC    |
| 2   | A                           | T                                                     | non-coding region | 222  | LSC    |
| 3   | G                           | T                                                     | non-coding region | 222  | LSC    |
| 4   | G                           | A                                                     | non-coding region | 222  | LSC    |
| 5   | C                           | A                                                     | non-coding region | 222  | LSC    |
| 6   | T                           | A                                                     | non-coding region | 222  | LSC    |
| 7   | A                           | G                                                     | non-coding region | 222  | LSC    |
| 8   | G                           | C                                                     | Gene (petA)       | 222  | LSC    |
| 9   | A                           | G                                                     | Gene (petA)       | 222  | LSC    |
| 10  | C                           | A                                                     | Gene (petA)       | 222  | LSC    |
| 11  | C                           | A                                                     | Gene (petA)       | 222  | LSC    |
| 12  | A                           | C                                                     | Gene(psbF)        | 15.1 | LSC    |
| 13  | A                           | T                                                     | non-coding region | 222  | LSC    |
| 14  | A                           | T                                                     | non-coding region | 222  | SSC    |
| 15  | T                           | G                                                     | non-coding region | 222  | SSC    |

**Table S3.** INDEL markers of *Capsicum annuum* var. *glabriusculum* chloroplast genome.

| No. | REF ( <i>C. annuum</i> ) | ALT ( <i>C. annuum</i> var. <i>glabriusculum</i> ) | Coding Region     | QUAL | Region |
|-----|--------------------------|----------------------------------------------------|-------------------|------|--------|
| 1   | ATTTTTTTTT               | ATTTTTTTTT                                         | non-coding region | 61.5 | LSC    |
| 2   | CTTTTTTTT                | CTTTTTTTTT,CTTTTTTTTT                              | non-coding region | 91.5 | LSC    |
| 3   | TAAAAAAAAA               | TAAAAAAAAA,TAAAAAAAAA                              | non-coding region | 84.5 | LSC    |
| 4   | CTTTTT                   | CTTTTT                                             | non-coding region | 207  | LSC    |
| 5   | TAAAAAA                  | TAAAAAA,TAAAAAA                                    | non-coding region | 158  | LSC    |
| 6   | GAAAAAAAAAAAAA           | GAAAAAAAAAAAAA,GAAAAAAAAAAAAA,GAAAAAAAAA           | non-coding region | 3.24 | LSC    |
| 7   | CTTTTTT                  | CTTTTTTT,CTTTTTTT                                  | non-coding region | 134  | LSC    |
| 8   | CTTTTTTTTTTT             | CTTTTTTTTTTTTT,CTTTTTTTTTTTTT                      | non-coding region | 11.8 | LSC    |
| 9   | TAAAAAA                  | TAAAAAA,TAAAAAA                                    | non-coding region | 121  | LSC    |
| 10  | GTTTTTTT                 | GTTTTTT                                            | non-coding region | 129  | LSC    |
| 11  | GTTTTTTTTT               | GTTTTTTTTT,GTTTTTTTTTT,GTTTTTTTTTTTT               | non-coding region | 74.5 | LSC    |
| 12  | TCAACTCATTTA             | T                                                  | non-coding region | 214  | LSC    |
| 13  | ATTTTT                   | ATTTTT                                             | non-coding region | 195  | LSC    |
| 14  | CAAAAAAAAAA              | CAAAAAAAAAA,CAAAAAAAAAA,CAAAAAAA                   | non-coding region | 56.5 | LSC    |
| 15  | ATTTTTTTTT               | ATTTTTTTTT,ATTTTTTTTT                              | non-coding region | 68.5 | LSC    |
| 16  | TAAAAAAAAA               | TAAAAAAAAA,TAAAAAAAAA                              | non-coding region | 49.5 | LSC    |
| 17  | GAAAAAA                  | GAAAAAA                                            | non-coding region | 148  | LSC    |
| 18  | ATTTTTTTTT               | ATTTTTTTT                                          | non-coding region | 96.5 | LSC    |
| 19  | CAAAAAAAAAA              | CAAAAAAAAAA,CAAAAAAAAAA                            | non-coding region | 48.5 | LSC    |
| 20  | AATCAAAGTAAATAAGAT       | AAT                                                | non-coding region | 217  | LSC    |
| 21  | TAAAAAA                  | TAAAAA                                             | non-coding region | 214  | LSC    |
| 22  | TT                       | TTCTTTATAT                                         | non-coding region | 214  | LSC    |
| 23  | ATTTTTTTTT               | ATTTTTTTTT,ATTTTTTTTT                              | non-coding region | 82.5 | LSC    |
| 24  | AGACTCCGGTAA             | AGACTCCGGTAAAGACTCCGGTAA                           | Gene (rpl20)      | 218  | LSC    |
| 25  | GTTTTTTTT                | GTTTTTTTT,GTTTTTTTT                                | non-coding region | 94.5 | LSC    |
| 26  | GAAAAAA                  | GAAAAAA                                            | non-coding region | 70.5 | LSC    |
| 27  | GAAAAAA                  | GAAAAAA,GAAAAAA,GAAAAAA                            | non-coding region | 90.5 | LSC    |
| 28  | CTTTTTTTTTT              | CTTTTTTTTTTT,CTTTTTTTTTTTTT                        | non-coding region | 39.5 | LSC    |
| 29  | CTTTT                    | CTTTT                                              | non-coding region | 214  | LSC    |
| 30  | ATTCTTATTTTT             | ATTATTTTTT                                         | Gene (rps19)      | 214  | LSC    |
| 31  | GTTTTTTTTT               | GTTTTTTTTTT                                        | Gene (rpl32)      | 29.5 | SSC    |
| 32  | TAAAAAA                  | TAAAAAA,TAAAAAA                                    | non-coding region | 75.5 | SSC    |
| 33  | TCCCC                    | TCCCC                                              | non-coding region | 187  | SSC    |
